# Supplementary material for: Antitumor effect of poly lactic acid nanoparticles loaded with cisplatin and chloroquine on the oral squamous cell carcinoma
Source: publisher site journal article supplement (doi:10.18632/aging.202297), 2020-12-11
Supplement: Supplementary file [file aging-v13i2-202297-supplementary-material-SD1.pdf]

## SUPPLEMENTARY FIGURES

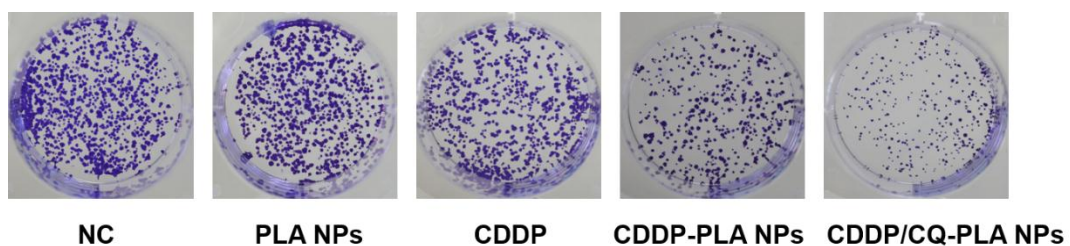

Supplementary Figure 1. CDDP/CQ-PLA NPs reduces the viability. Colony forming assays in SCC4 cells.

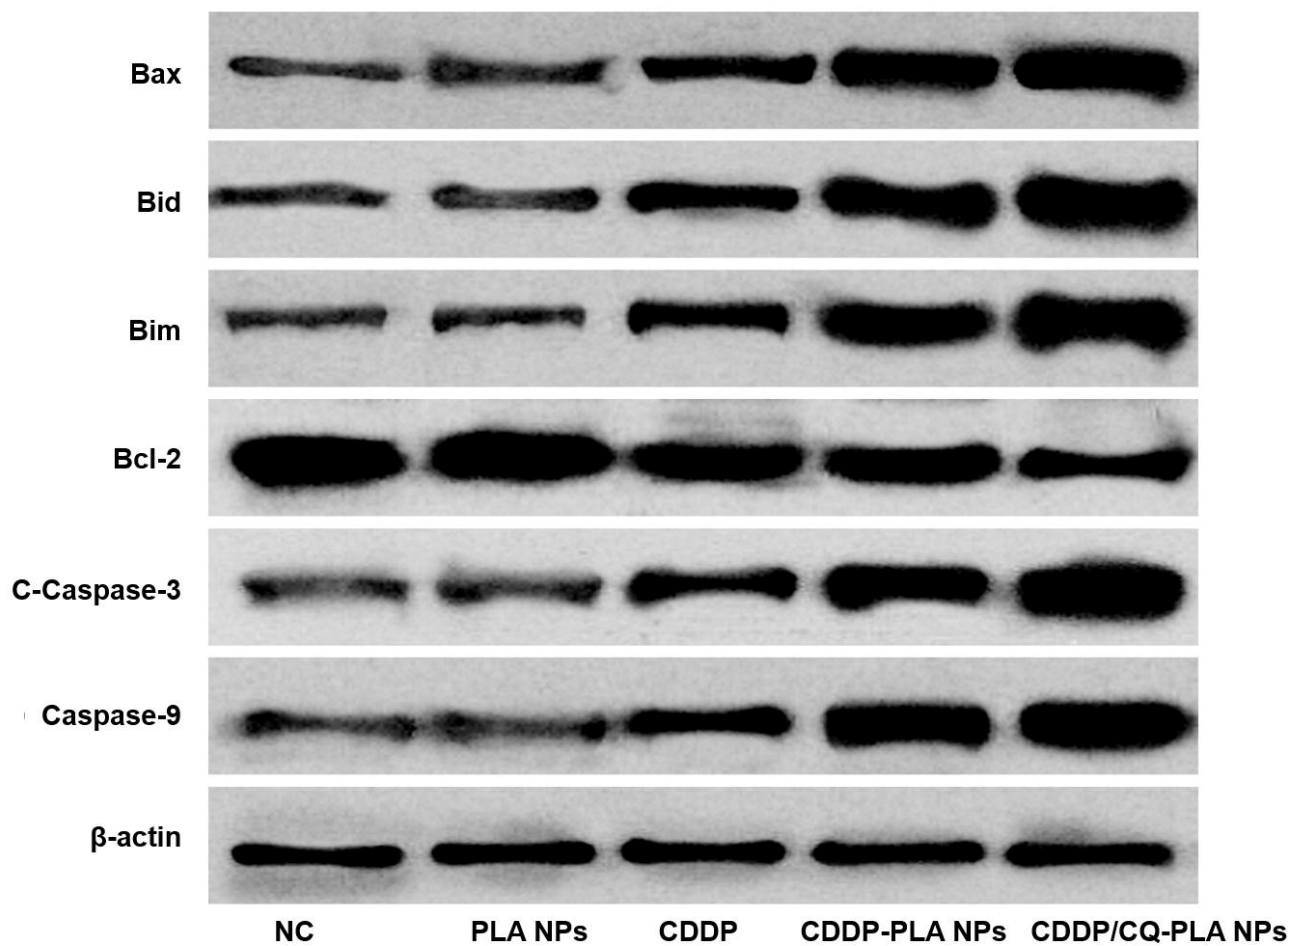

Supplementary Figure 2. CDDP/CQ-PLA NPs induces caspase-dependent apoptosis in SCC4 cells. Western blot of Bax, Bid, Bim, Bcl-2, cleaved-Caspase-3, and Caspase-9,  $\beta$ -actin as reference.

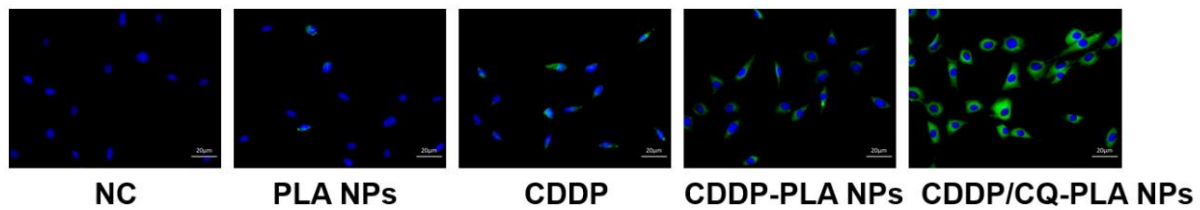

**Supplementary Figure 3. CDDP/CQ-PLA NPs induces oxidative damage. ROS production in SCC4 cells.**

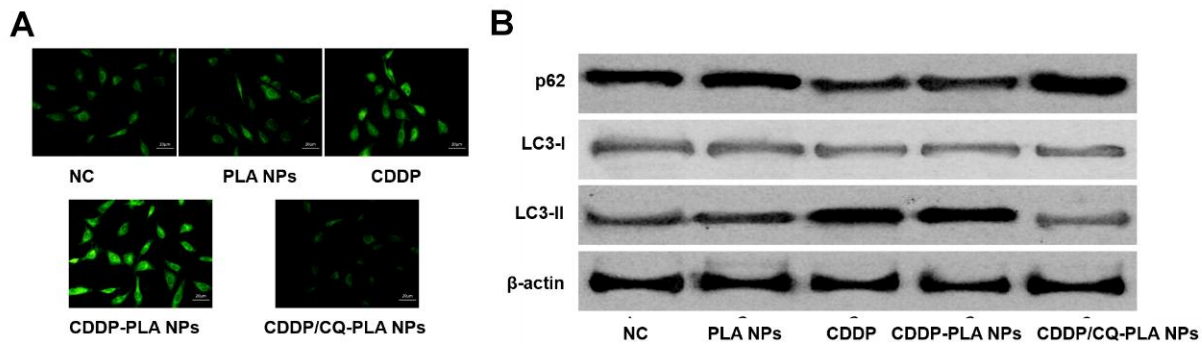

**Supplementary Figure 4. CDDP/CQ-PLA NPs reduces autophagy in SCC4 cells. (A) Immunofluorescence confocal image of LC3; (B) Western blot of p62, LC3-I, and LC3-II, actin as reference.**
